# Supplementary material for: Application of Three-Dimensional Imaging to the Intestinal Crypt Organoids and Biopsied Intestinal Tissues
Source: ScientificWorldJournal. 2013 Nov 14;2013:624342. doi: 10.1155/2013/624342 (PMC3848346; doi:10.1155/2013/624342)
Supplement: Supplementary file 1 — Video S1. 360-degree presentation of the propidium iodide-labeled crypt organoid as in Figure 2B. This video provided panoramic view of the 3D crypt organoid. Dimensions of the projected volume: 512 μm (X) × 512 μm (Y) × 150 μm (Z, depth). Video S2 and S3. 360-degree presentation of the propidium iodide-labeled biopsied intestinal tissues (without rejection) after intestinal transplantation, as in Figure 3C. This video provided panoramic view of the 3D intestinal tissue. Dimensions of the projected volume: 921 μm (X) × 912 μm (Y) × 150 μm (Z, depth). Video S4 and S5. 360-degree presentation of the PI-labeled biopsied intestinal tissues (with acute rejection) after intestinal transplantation, as in Figure 3D. This video provided panoramic view of the 3D intestinal tissues with rejection and arrows indicated residual crypts. Dimensions of the projected volume: 1024 μm (X) × 1024 μm (Y) × 100 μm (Z, depth). [file 624342.f1.zip]

Archive with 5 entries (5 files):
- Video S1.mpg
- Video S2.mpg
- Video S3.mpg
- Video S4.mpg
- Video S5.mpg
